# Supplementary material for: Magnetically separable ZnFe2O4, Fe2O3/ZnFe2O4 and ZnO/ZnFe2O4 hollow nanospheres with enhanced visible photocatalytic properties
Source: Royal Society of Chemistry journal article supplement (doi:10.1039/c4ra06389a), 2014-01-01
Supplement: c4ra06389a1.pdf [file c4ra06389a1.pdf]

**Supporting Information for**  
**Magnetically Separable  $\text{ZnFe}_2\text{O}_4$ ,  $\text{Fe}_2\text{O}_3/\text{ZnFe}_2\text{O}_4$  and  $\text{ZnO}/\text{ZnFe}_2\text{O}_4$**   
**Hollow Nanospheres with Enhanced Visible Photocatalytic Property**

Junqi Li, Zhenxing Liu, Zhenfeng Zhu

School of Materials Science and Engineering, Shaanxi University of Science and  
Technology, Xi'an 710021, PR China

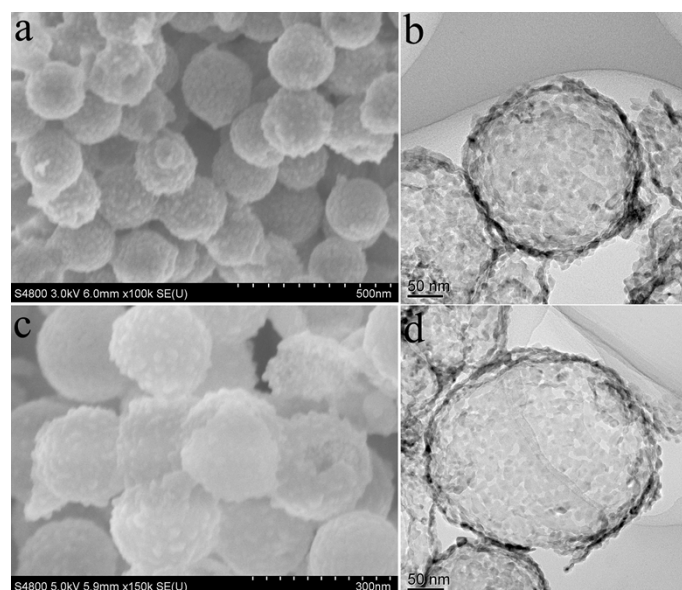

**Figure S1.** SEM and TEM images of  $\text{ZnO}/\text{ZnFe}_2\text{O}_4$ (a, b) and  $\text{Fe}_2\text{O}_3/\text{ZnFe}_2\text{O}_4$ (c, d) hollow nanospheres.

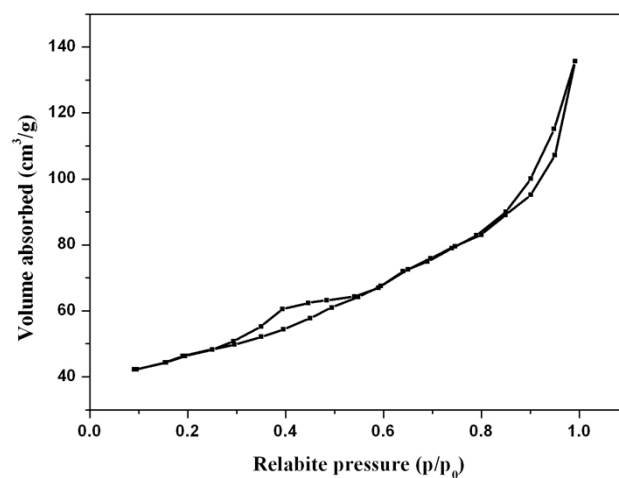

**Figure S2.** Nitrogen adsorption-desorption isotherms for the  $\text{ZnFe}_2\text{O}_4$  hollow nanospheres.

**Table S1.** The BET specific surface area of the samples.

| Samples                                       | ZnFe <sub>2</sub> O <sub>4</sub><br>(S1) | ZnO/ZnFe <sub>2</sub> O <sub>4</sub><br>(S2) | Fe <sub>2</sub> O <sub>3</sub> /ZnFe <sub>2</sub> O <sub>4</sub><br>(S3) | bulk ZnFe <sub>2</sub> O <sub>4</sub><br>(S4) |
|-----------------------------------------------|------------------------------------------|----------------------------------------------|--------------------------------------------------------------------------|-----------------------------------------------|
| BET specific surface area (m <sup>2</sup> /g) | 95.8                                     | 98.2                                         | 96.6                                                                     | 13.5                                          |

Figure S2. show the nitrogen adsorption-desorption isotherms of the ZnO/ZnFe<sub>2</sub>O<sub>4</sub> hollow nanospheres. The Brunauer-Emmett-Teller (BET) specific surface area of all samples was presented in the Table S1.
